# Supplementary material
Source: PubMed Central journal article supplement (PMC2950420)
Supplement: supp_9_10_1519__4.pdf [file supp_9_10_1519__4.pdf]

**Supplemental Table 1.** Primers used in this study. Recognition sequences for restriction enzymes are shown in bold and italics and homologous sequences to the *hDHFR* cassette used for generation of a *PbPI3K* knock out construct are underlined.

| Primer | Sequence (5' - 3')                                                                                   |
|--------|------------------------------------------------------------------------------------------------------|
| 155    | <b><i>AGATCT ATCGAT</i></b> ACGTTTTTCTTACTTATATATTTATACC                                             |
| 156    | <b><i>CTGCAG</i></b> ATCGAAATTGAAGGAAAAAC                                                            |
| 157    | <b><i>AGATCT</i></b> GGTGGACCTGGTGGTTACCCTTACGATGTTCTG                                               |
| 158    | <b><i>ATCGAT</i></b> TTTATCGTCCTCCTGGTTCATACAGCATCCTGGACAGCA<br>GTTTAGGAAAGAACCTGCGACTCCAGCGTAATCTGG |
| 159    | <b><i>CCGCGG</i></b> CTTTAATTTTGCCAATAGATCC                                                          |
| 160    | <b><i>AGATCT</i></b> TCCACCAGGTCCACC TTTCCAGTTTAAAGCCCATTCC                                          |
| 161    | AAGAGATAAAAAATGAGAAAATCG                                                                             |
| 162    | <u>GCTGGGCTGCAGAGGCCTGTTAAC</u> CTATTATCTTAAATCGATTGTATGG                                            |
| 164    | <u>ATTTTTATCTTATCCCAAATTAAGC</u>                                                                     |
| 168    | <u>CGATGGGTACCCTCGAGGCTAGCGA</u> TTTTTGTA CTGCAATTTACAATCC                                           |
| 175    | GGTTCGCTAAACTGCATCG                                                                                  |
| 176    | GAGAACACCTGGGTATTCTGG                                                                                |
| 181    | <b><i>CTCGAG</i></b> CTTTAATTTTGCCAATAGATCC                                                          |
| 182    | <b><i>GCTAGC</i></b> TTTCCAGTTTAAAGCCCATTCC                                                          |
| 185    | TACAACCTAATGATGGCTTTGG                                                                               |
| 200    | ACATATGGGGATTGTAAATGC                                                                                |
| 202    | ATGAACAAATACATAAGAGCGCC                                                                              |
| 207    | GCCCTCCCAACATAACCAG                                                                                  |
| 211    | ATGCATGCCAAGCCTTTGTCTCAAG                                                                            |
| 242    | TGGGGTGATGATAAAAATGAAAG                                                                              |
| 244    | ATT <b><i>CCTAGG</i></b> ATGGTGAGCAAGGGCGAGG                                                         |
| 245    | TAT <b><i>CTTAAG</i></b> TTATGCCTTCTTGTTTCAGCTGC                                                     |
| 251    | TGAGTACTTGTACAGCTCGTCC                                                                               |
| 272    | <b><i>AAGCTT CTCGAG</i></b> CCGGAATTCGAAAGTG                                                         |
| 273    | GGATC <b><i>CTTAAG</i></b> CTCGACTCGACTTATGC                                                         |
| 274    | <b><i>AGATCT</i></b> TTTATTTCCAGTTTAAAGCCCATTCC                                                      |
| DHter  | CATTTTTACAGTTATAAATAACAATCAATTG                                                                      |
