# Supplementary material
Source: PubMed Central journal article supplement (PMC2950420)

**A**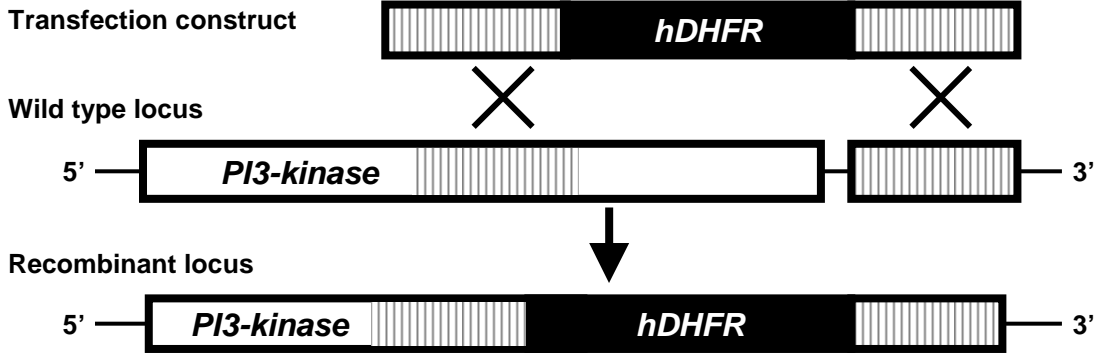**B**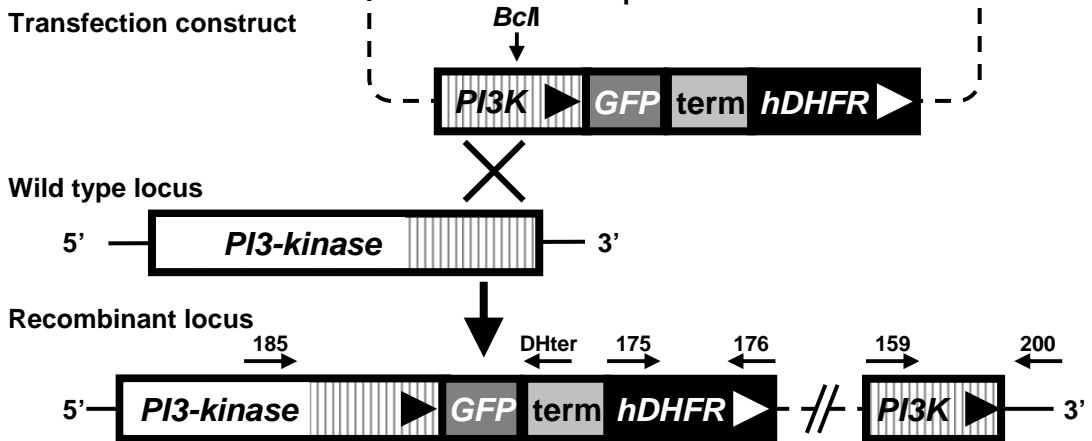**C**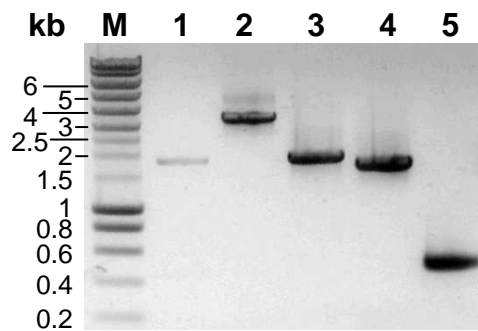

Supplement: supp_9_10_1519__2.pdf [file supp_9_10_1519__2.pdf]

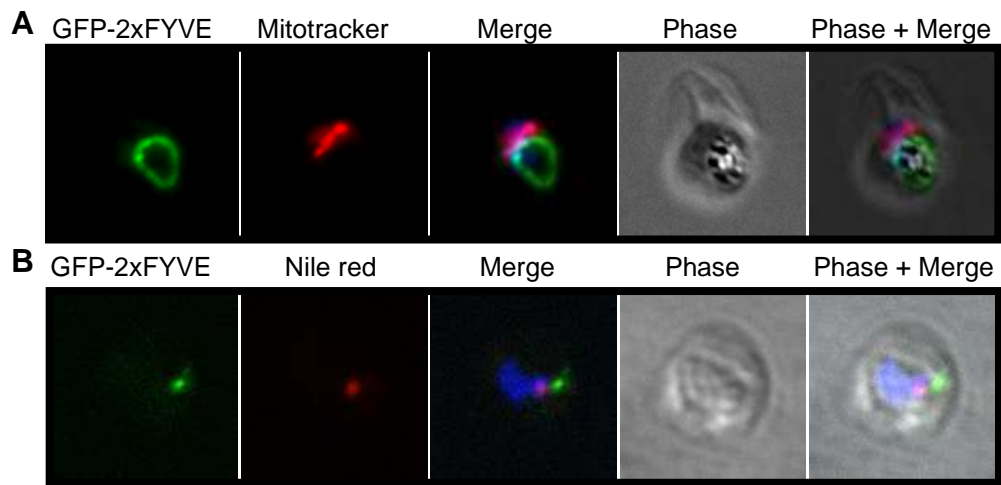

Supplement: supp_9_10_1519__3.pdf [file supp_9_10_1519__3.pdf]
